# Supplementary material for: Human Endogenous Retroviruses in Glioblastoma Multiforme
Source: MDPI journal article supplement (doi:10.3390/microorganisms9040764), 2021-04-06
Supplement: s1 [file s1]

**Supplementary Table 1.** The list of the samples, experiments and their accessions (SRA or GEO) used for this study.

| <b>Accession</b> | <b>Sample Types</b> | <b>Size</b> |
|------------------|---------------------|-------------|
| SRX658054        | Non-GBM tissues     | 3.8Gbp      |
| SRX658055        | Non-GBM tissues     | 3.8Gbp      |
| SRX658056        | Non-GBM tissues     | 3.7Gbp      |
| SRX658057        | Non-GBM tissues     | 3.9Gbp      |
| SRX658058        | Non-GBM tissues     | 3.5Gbp      |
| SRX658059        | Non-GBM tissues     | 3.4Gbp      |
| SRX658060        | Non-GBM tissues     | 7.4Gbp      |
| SRX658061        | Non-GBM tissues     | 4.4Gbp      |
| SRX658062        | Non-GBM tissues     | 2.6Gbp      |
| SRX658063        | Non-GBM tissues     | 3.0Gbp      |
| SRX658064        | Non-GBM tissues     | 3.2Gbp      |
| SRX658065        | Non-GBM tissues     | 3.6Gbp      |
| SRX658066        | Non-GBM tissues     | 4.1Gbp      |
| SRX658067        | Non-GBM tissues     | 3.3Gbp      |
| SRX658068        | Non-GBM tissues     | 3.1Gbp      |
| SRX658069        | Non-GBM tissues     | 3.1Gbp      |
| SRX658070        | Non-GBM tissues     | 4.0Gbp      |
| ERX1546036       | Non-GBM tissues     | 11.3Gbp     |
| ERX1546037       | Non-GBM tissues     | 11.9Gbp     |
| ERX1546038       | Non-GBM tissues     | 12.6Gbp     |
| ERX1546039       | Non-GBM tissues     | 10.9Gbp     |
| ERX1546040       | Non-GBM tissues     | 11.7Gbp     |
| ERX1546041       | Non-GBM tissues     | 12.7Gbp     |
| ERX1546042       | Non-GBM tissues     | 12.7Gbp     |
| ERX1546043       | Non-GBM tissues     | 12.4Gbp     |

|            |                 |         |
|------------|-----------------|---------|
| ERX1546044 | Non-GBM tissues | 12.7Gbp |
| ERX1546045 | Non-GBM tissues | 11.9Gbp |
| SRX3257506 | Non-GBM tissues | 2.9Gbp  |
| SRX3257507 | Non-GBM tissues | 1.9Gbp  |
| SRX3257508 | Non-GBM tissues | 2.7Gbp  |
| SRX3257509 | Non-GBM tissues | 2.8Gbp  |
| SRX3257510 | Non-GBM tissues | 2.9Gbp  |
| SRX3257511 | Non-GBM tissues | 2.9Gbp  |
| SRX3257512 | Non-GBM tissues | 2.3Gbp  |
| SRX3257513 | Non-GBM tissues | 2.7Gbp  |
| SRX3257514 | Non-GBM tissues | 2.8Gbp  |
| SRX3257515 | Non-GBM tissues | 2.8Gbp  |
| SRX3257516 | Non-GBM tissues | 2.7Gbp  |
| SRX3257517 | Non-GBM tissues | 3.1Gbp  |
| SRX3257518 | Non-GBM tissues | 2.9Gbp  |
| SRX3257519 | Non-GBM tissues | 3.0Gbp  |
| SRX3257520 | Non-GBM tissues | 3.0Gbp  |
| SRX3257521 | Non-GBM tissues | 2.9Gbp  |
| SRX3257522 | Non-GBM tissues | 2.7Gbp  |
| SRX3257523 | Non-GBM tissues | 3.3Gbp  |
| SRX1689920 | GBM cell line   | 1.7Gbp  |
| SRX1689921 | GBM cell line   | 1.6Gbp  |
| SRX2210471 | GBM cell line   | 10.6Gbp |
| SRX2592104 | GBM cell line   | 13.2Gbp |
| SRX3467084 | GBM cell line   | 16.4Gbp |
| SRX3467085 | GBM cell line   | 13.8Gbp |
| SRX3467086 | GBM cell line   | 19.2Gbp |
| SRX1689924 | GBM cell line   | 1.8Gbp  |
| SRX1689925 | GBM cell line   | 1.8Gbp  |

|            |            |        |
|------------|------------|--------|
| SRX2162078 | GBM tissue | 9.1Gbp |
| SRX2162080 | GBM tissue | 8.0Gbp |
| SRX2162082 | GBM tissue | 8.2Gbp |
| SRX2162084 | GBM tissue | 8.4Gbp |
| SRX2875070 | GBM tissue | 8.3Gbp |
| SRX2875071 | GBM tissue | 7.7Gbp |
| SRX2875072 | GBM tissue | 8.1Gbp |
| SRX658014  | GBM tissue | 3.3Gbp |
| SRX658013  | GBM tissue | 3.4Gbp |
| SRX658012  | GBM tissue | 2.8Gbp |
| SRX658011  | GBM tissue | 2.2Gbp |
| SRX658010  | GBM tissue | 1.8Gbp |
| SRX658009  | GBM tissue | 2.5Gbp |
| SRX658008  | GBM tissue | 2.2Gbp |
| SRX658007  | GBM tissue | 2.3Gbp |
| SRX658006  | GBM tissue | 3.0Gbp |
| SRX658005  | GBM tissue | 2.5Gbp |
| SRX658004  | GBM tissue | 2.0Gbp |
| SRX658003  | GBM tissue | 1.7Gbp |
| SRX658002  | GBM tissue | 2.1Gbp |
| SRX658001  | GBM tissue | 2.4Gbp |
| SRX658000  | GBM tissue | 2.4Gbp |
| SRX657999  | GBM tissue | 2.2Gbp |
| SRX657998  | GBM tissue | 2.7Gbp |
| SRX657997  | GBM tissue | 2.4Gbp |
| SRX657996  | GBM tissue | 2.1Gbp |
| SRX657995  | GBM tissue | 2.5Gbp |
| SRX657994  | GBM tissue | 2.2Gbp |
| SRX657993  | GBM tissue | 2.0Gbp |

|           |            |        |
|-----------|------------|--------|
| SRX657992 | GBM tissue | 2.1Gbp |
| SRX657991 | GBM tissue | 2.2Gbp |
| SRX657990 | GBM tissue | 2.5Gbp |
| SRX657989 | GBM tissue | 2.1Gbp |
| SRX657988 | GBM tissue | 3.8Gbp |
| SRX657987 | GBM tissue | 2.3Gbp |
| SRX657986 | GBM tissue | 3.0Gbp |
| SRX657985 | GBM tissue | 3.1Gbp |
| SRX657984 | GBM tissue | 3.1Gbp |
| SRX657983 | GBM tissue | 3.2Gbp |
| SRX657982 | GBM tissue | 3.5Gbp |
| SRX657981 | GBM tissue | 2.9Gbp |
| SRX657980 | GBM tissue | 2.6Gbp |
| SRX657979 | GBM tissue | 3.8Gbp |
| SRX658053 | GBM tissue | 3.5Gbp |
| SRX658052 | GBM tissue | 3.7Gbp |
| SRX658051 | GBM tissue | 3.2Gbp |
| SRX658050 | GBM tissue | 3.8Gbp |
| SRX658049 | GBM tissue | 4.3Gbp |
| SRX658048 | GBM tissue | 3.2Gbp |
| SRX658047 | GBM tissue | 3.2Gbp |
| SRX658046 | GBM tissue | 3.1Gbp |
| SRX658045 | GBM tissue | 2.7Gbp |
| SRX658044 | GBM tissue | 3.7Gbp |
| SRX658043 | GBM tissue | 2.8Gbp |
| SRX658042 | GBM tissue | 2.8Gbp |
| SRX658041 | GBM tissue | 2.9Gbp |
| SRX658040 | GBM tissue | 3.3Gbp |
| SRX658039 | GBM tissue | 3.8Gbp |

|            |            |         |
|------------|------------|---------|
| SRX658038  | GBM tissue | 3.2Gbp  |
| SRX658037  | GBM tissue | 1.8Gbp  |
| SRX658036  | GBM tissue | 2.2Gbp  |
| SRX658035  | GBM tissue | 2.3Gbp  |
| SRX658034  | GBM tissue | 3.6Gbp  |
| SRX658033  | GBM tissue | 1.7Gbp  |
| SRX658032  | GBM tissue | 3.0Gbp  |
| SRX658031  | GBM tissue | 2.0Gbp  |
| SRX658030  | GBM tissue | 1.9Gbp  |
| SRX658029  | GBM tissue | 2.4Gbp  |
| SRX658028  | GBM tissue | 2.0Gbp  |
| SRX658027  | GBM tissue | 1.9Gbp  |
| SRX658026  | GBM tissue | 2.4Gbp  |
| SRX658025  | GBM tissue | 2.7Gbp  |
| SRX658024  | GBM tissue | 2.3Gbp  |
| SRX658023  | GBM tissue | 2.3Gbp  |
| SRX658022  | GBM tissue | 2.6Gbp  |
| SRX658021  | GBM tissue | 2.4Gbp  |
| SRX658020  | GBM tissue | 2.1Gbp  |
| SRX658019  | GBM tissue | 2.4Gbp  |
| SRX658018  | GBM tissue | 2.1Gbp  |
| SRX658017  | GBM tissue | 2.6Gbp  |
| SRX658016  | GBM tissue | 2.7Gbp  |
| SRX658015  | GBM tissue | 2.7Gbp  |
| ERX1097381 | GBM tissue | 12.5Gbp |
| ERX1097382 | GBM tissue | 22.0Gbp |
| ERX1097383 | GBM tissue | 16.7Gbp |
| ERX1097384 | GBM tissue | 32.0Gbp |
| ERX1097385 | GBM tissue | 10.2Gbp |

|            |               |         |
|------------|---------------|---------|
| ERX1097386 | GBM tissue    | 13.3Gbp |
| ERX1097387 | GBM tissue    | 23.5Gbp |
| ERX1097388 | GBM tissue    | 6.2Gbp  |
| ERX1097389 | GBM tissue    | 21.1Gbp |
| ERX1097390 | GBM tissue    | 21.5Gbp |
| ERX1097391 | GBM tissue    | 24.6Gbp |
| ERX1097392 | GBM tissue    | 9.2Gbp  |
| ERX1097393 | GBM tissue    | 11.4Gbp |
| ERX1097394 | GBM tissue    | 17.9Gbp |
| ERX1097395 | GBM tissue    | 10.7Gbp |
| ERX1097396 | GBM tissue    | 18.1Gbp |
| ERX1097397 | GBM tissue    | 20.1Gbp |
| ERX1097398 | GBM tissue    | 16.8Gbp |
| SRX745136  | GBM tissue    | 19.5Gbp |
| SRX745137  | GBM tissue    | 17.9Gbp |
| SRX885961  | GBM cell line | 6.2Gbp  |
| SRX885962  | GBM cell line | 6.3Gbp  |
| SRX897035  | GBM tissue    | 5.9Gbp  |
| SRX897040  | GBM tissue    | 5.8Gbp  |
| SRX971972  | GBM cell line | 12.8Gbp |
| SRX972006  | GBM cell line | 15.5Gbp |
| SRX972008  | GBM cell line | 14.0Gbp |
| SRX1023992 | GBM cell line | 5.3Gbp  |
| SRX1023993 | GBM cell line | 4.6Gbp  |
| SRX1023994 | GBM cell line | 4.5Gbp  |
| SRX1166514 | GBM cell line | 5.5Gbp  |
| SRX1177329 | GBM tissue    | 4.9Gbp  |
| SRX1177330 | GBM tissue    | 5.7Gbp  |
| SRX1177331 | GBM tissue    | 3.6Gbp  |

|            |               |        |
|------------|---------------|--------|
| SRX1177332 | GBM tissue    | 4.3Gbp |
| SRX1177333 | GBM tissue    | 4.1Gbp |
| SRX1177334 | GBM tissue    | 4.6Gbp |
| SRX1177335 | GBM cell line | 2.2Gbp |
| SRX1177336 | GBM cell line | 1.8Gbp |
| SRX1177337 | GBM cell line | 1.3Gbp |
| SRX1177338 | GBM cell line | 2.1Gbp |
| SRX1177339 | GBM cell line | 4.7Gbp |
| SRX1177340 | GBM cell line | 5.4Gbp |
| SRX1177341 | GBM cell line | 5.3Gbp |
| SRX1177342 | GBM cell line | 4.6Gbp |
| SRX1177365 | GBM tissue    | 2.9Gbp |
| SRX1225208 | GBM cell line | 4.9Gbp |
| SRX1225209 | GBM cell line | 3.1Gbp |
| SRX1225210 | GBM cell line | 3.7Gbp |
| SRX1225211 | GBM cell line | 3.5Gbp |
